# Supplementary material for: Disordered carbon tubes based on cotton cloth for modulating interface impedance in β′′-Al2O3-based solid-state sodium metal batteries
Source: Royal Society of Chemistry journal article supplement (doi:10.1039/c8ta01883a), 2018-01-01
Supplement: c8ta01883a1.pdf [file c8ta01883a1.pdf]

# Supporting Information

## Disordered Carbon Tubes Based on Cotton Cloth for Modulating the Interface Impedance in $\beta''$ -Al<sub>2</sub>O<sub>3</sub>-based Solid-state Sodium Metal Batteries

*Tian Wu*<sup>a,b</sup>, *Zhaoyin Wen*<sup>a,\*</sup>, *Changzhi Sun*<sup>a,b</sup>, *Sanpei zhang*<sup>a</sup>, *Xiangwei Wu*<sup>a</sup>, and  
*Jianhua Yang*<sup>a</sup>

<sup>a</sup> Shanghai Institute of Ceramics, Chinese Academy of Sciences, Shanghai 200050,  
P.R. China

<sup>b</sup> Graduate School of Chinese Academy of Sciences, Beijing, 100039, P.R. China

**Corresponding Author** Tel: +86-21-52411704, +86-21-52412267, Fax: +86-21-  
52413903

\*E-mail address: zywen@mail.sic.ac.cn

**Keywords:** carbon tubes,  $\beta''$ -Al<sub>2</sub>O<sub>3</sub>, interfaces, sodium anode, solid-state sodium  
batteries.

1. SEM images for cross-section (a) and top view (b) of the BASE pellet.

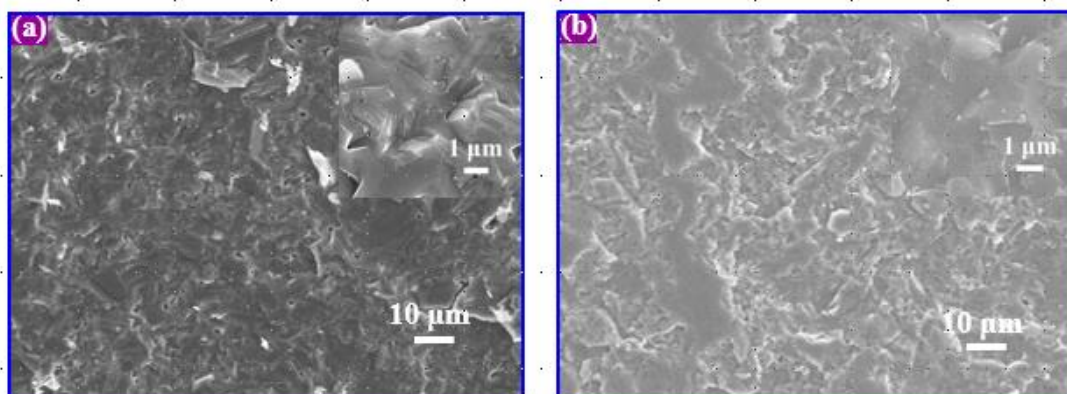

Figure S1. SEM images for cross-section (a) and top view (b) of the BASE pellet.

2. EIS of the BASE pellets at low temperature from -20–40 °C.

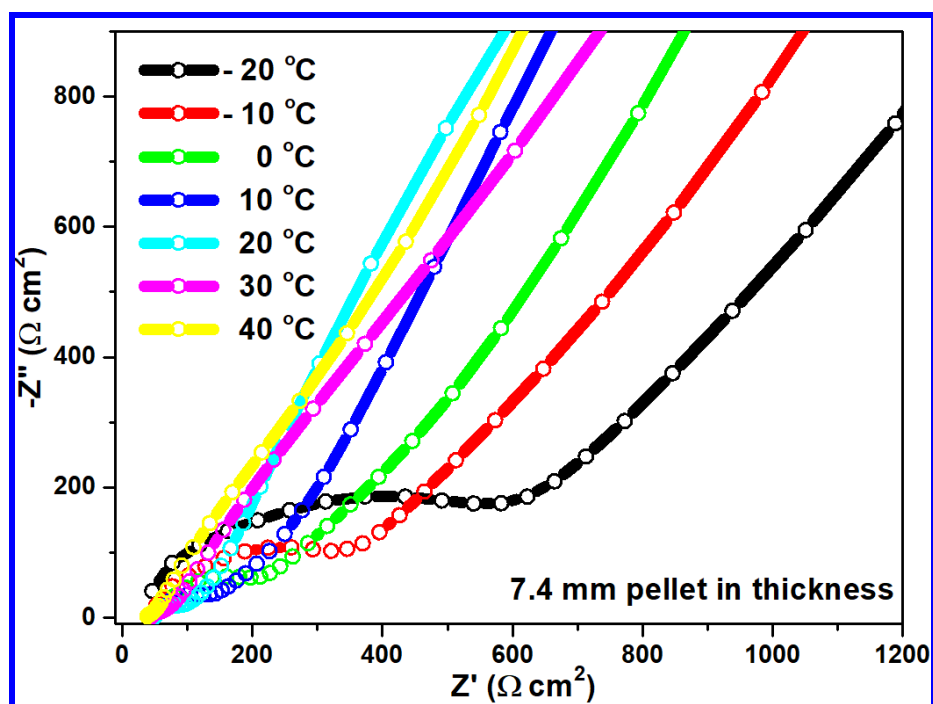

Figure S2. EIS of the BASE pellets at low temperature from -20–40 °C.

3. Arrhenius plot of the BASE ionic conductivity.

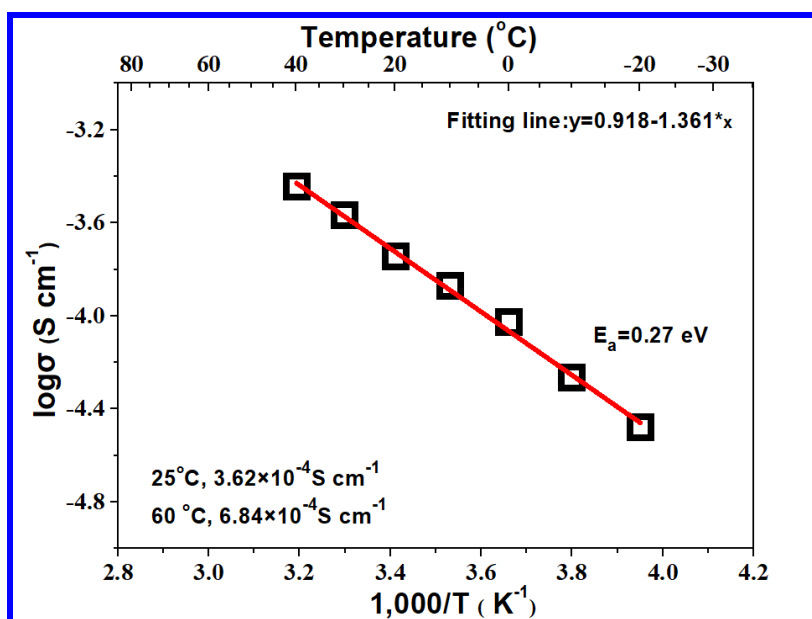

Figure S3. Arrhenius plot of the BASE ionic conductivity.

4. A photo comparing the white cotton cloth and black DCDCT.

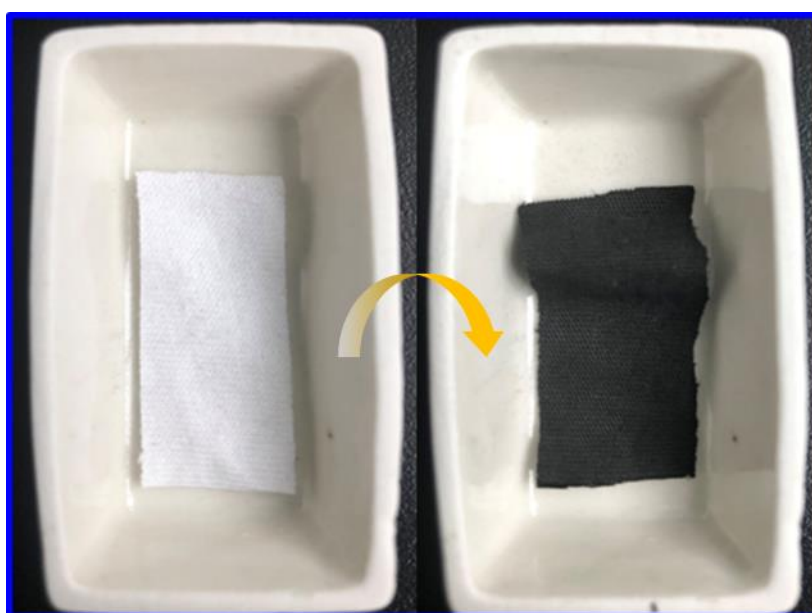

Figure S4. A photo comparing the white cotton cloth and black DCDCT.

5. The SEM image of the textile cotton cloth.

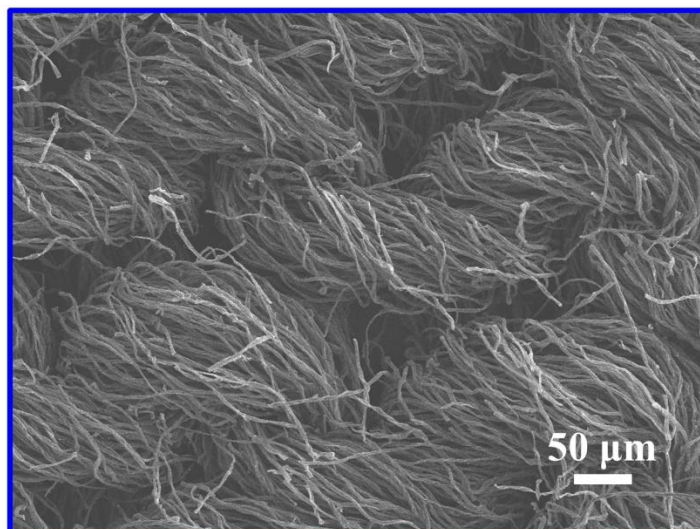

**Figure S5.** The SEM image of the textile cotton cloth.

6. Time evolution of Na infusion into DCT-BASE.

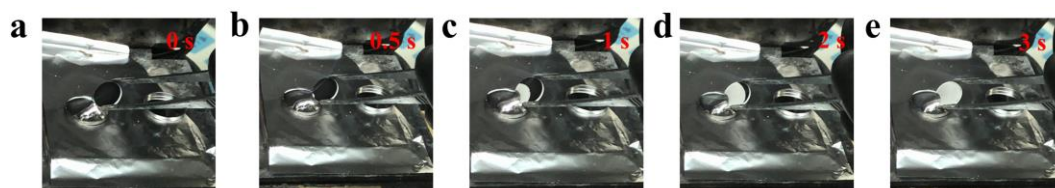

**Figure S6.** Time evolution of Na infusion into DCT-BASE. Time-lapse images (a, 0s; b, 0.5 s; c, 1s; d, 2s; e, 3s) of Na infusion process into the DCT layer. The edge of the DCT-BASE was put in contact with the molten Na.

7. Simple test on separating sodium metal from the BASE.

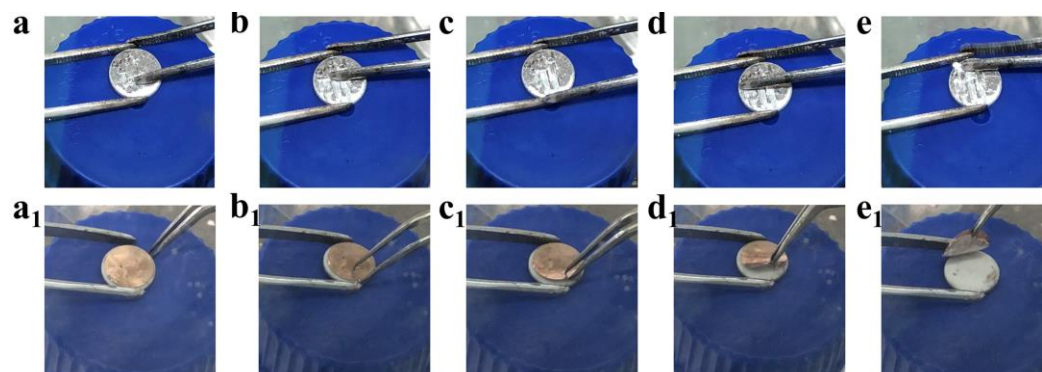

**Figure S7.** Test on separating sodium metal from the DCT-BASE (a-e) and untreated BASE surface with tweezers (a<sub>1</sub>-e<sub>1</sub>).

## 8. SEM images of the BASE/Na and DCT-BASE/Na interface.

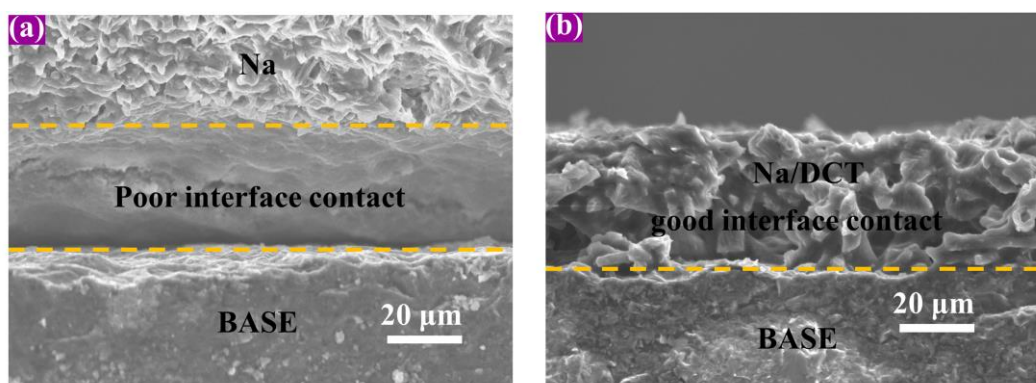

**Figure S8.** SEM images of the BASE/Na and DCT-BASE/Na interface.

## 9. Electrochemical performance of the DCT electrodes for NIBs.

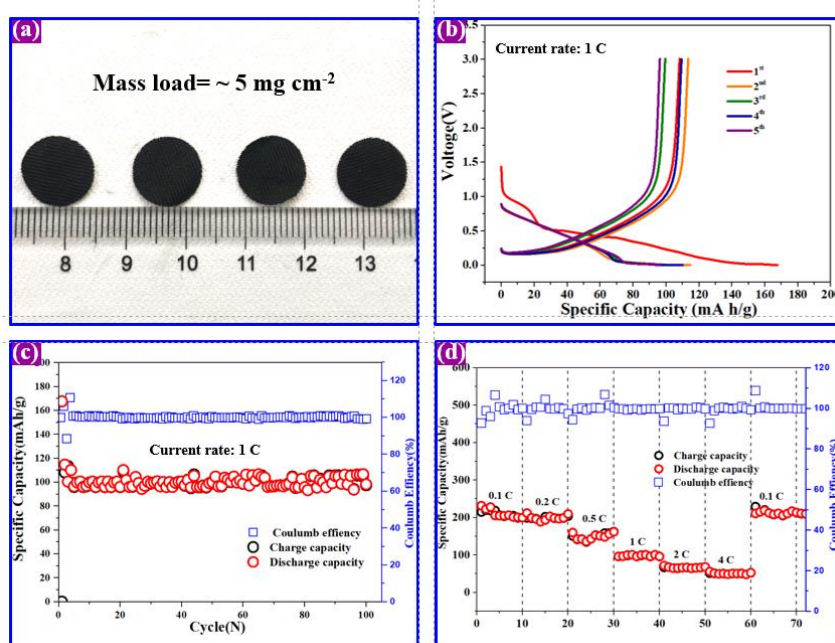

**Figure S9.** Electrochemical performance of the DCT electrodes for NIBs. (a) photograph of the disordered carbon tubes (DCT) electrode. (b) Charge/discharge profiles during the initial five cycles of the DCT electrode at current rate of 1 C. (c) Cycle performance of the DCT electrode at a rate of 1 C (d) Rate performance of the DCT electrode.

## 10. Rate performances of the Na/DCT-BASE/Na symmetric cells at different current densities.

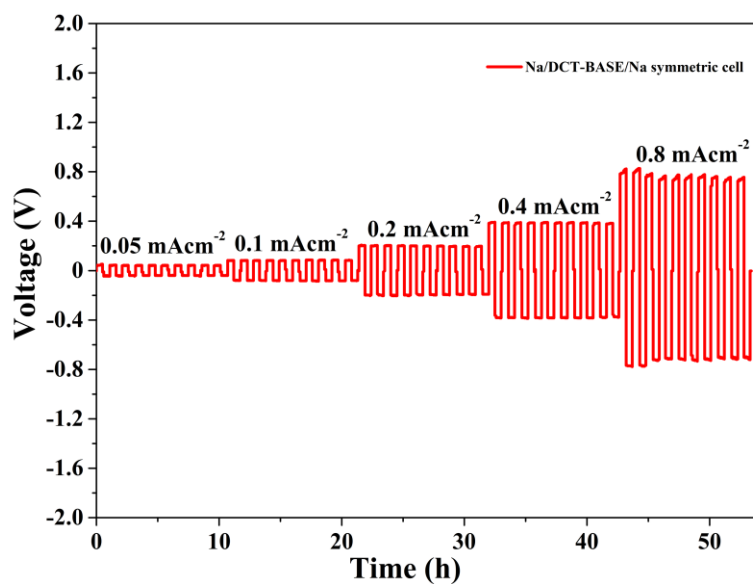

**Figure S10.** Rate performances of the Na/DCT-BASE/Na symmetric cells at different current densities.

**11. SEM and EDX mapping images of the cross-sectional Na/DCT-BASE interface after 100 cycles.**

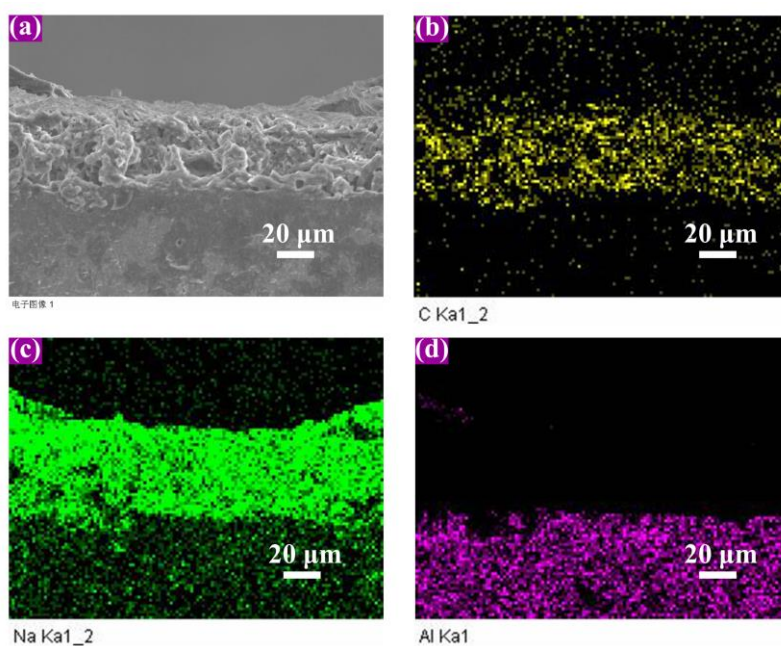

**Figure S11.** SEM image of the cross-sectional Na/DCT-BASE interface after 100 cycles (a), Corresponding C, Na and Al elemental maps (b-d).

**12. Corresponding fitted equivalent electrical circuit of the solid-state sodium batteries with the DCT modified BASE.**

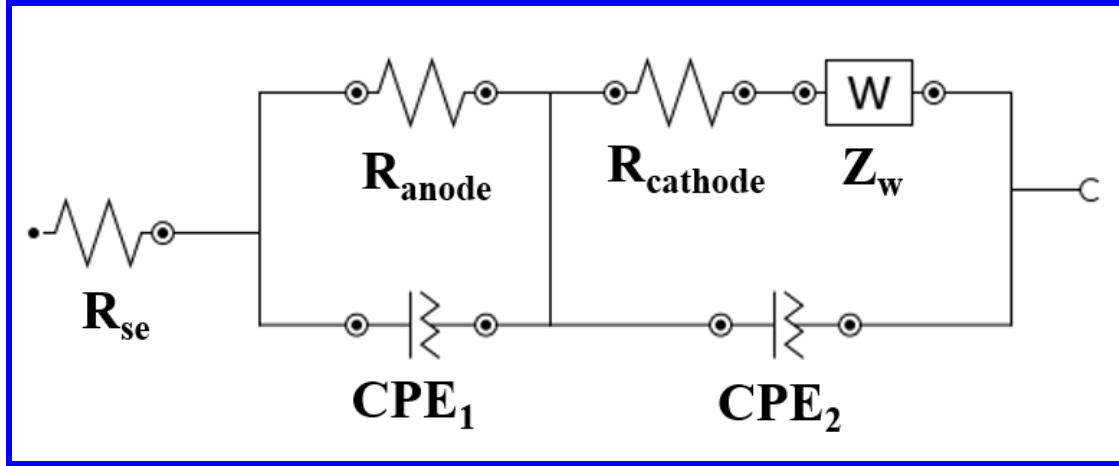

**Figure S12.** Corresponding fitted equivalent electrical circuit of the solid-state sodium batteries with the DCT modified BASE.  $R_{se}$  represents the impedance contributed by the solid electrolyte;  $R_{anode}$  and  $CPE_1$  represent the resistance and capacitance of the anode interface, respectively (high-frequency).  $R_{cathode}$  and  $CPE_2$  are the resistance and capacitance of the cathode interface, respectively (medium-frequency).  $Z_w$  is the Warburg impedance related to the diffusion of Na ions into the electrodes.

**Table S1.** The interfacial resistances of the solid-state sodium batteries on the anode side ( $R_{anode}$ ) and on cathode side ( $R_{cathode}$ ) with the DCT-modified BASE before cycling and after 100 cycles.

| Resistances   | Before cycling | After 100 cycles |
|---------------|----------------|------------------|
| $R_{se}$      | 15.4           | 15.5             |
| $R_{anode}$   | 155.1          | 200.2            |
| $R_{cathode}$ | 213.2          | 510.5            |

### 13. Rate performance of the solid-state cells with the DCT-modified BASE.

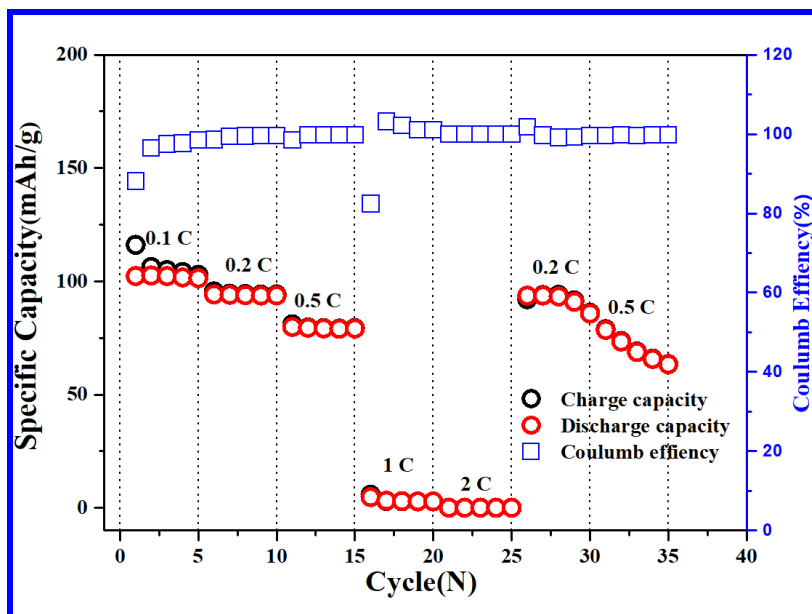

**Figure S13.** Rate performance of the solid-state cells with the DCT-modified BASE.
